# Supplementary material for: Isolation of Cherry Seed Oil Using Conventional Techniques and Supercritical Fluid Extraction
Source: MDPI journal article supplement (doi:10.3390/foods12010011), 2022-12-20
Supplement: s1 [file s1]

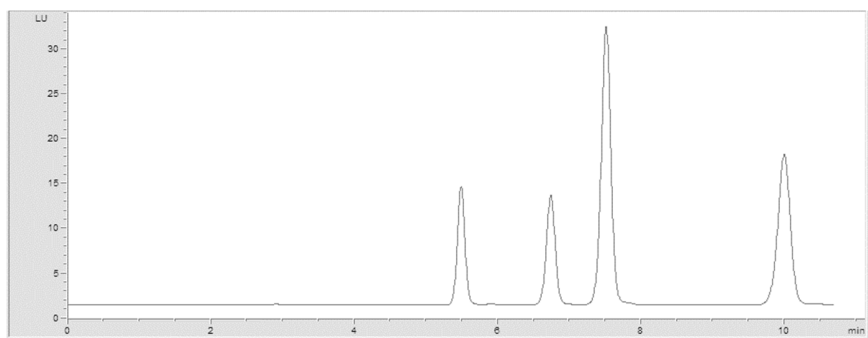

Figure S1. Chromatogram of tocopherol standards ( $\alpha$ -,  $\beta$ -,  $\gamma$ -,  $\delta$ -tocopherol, respectively)

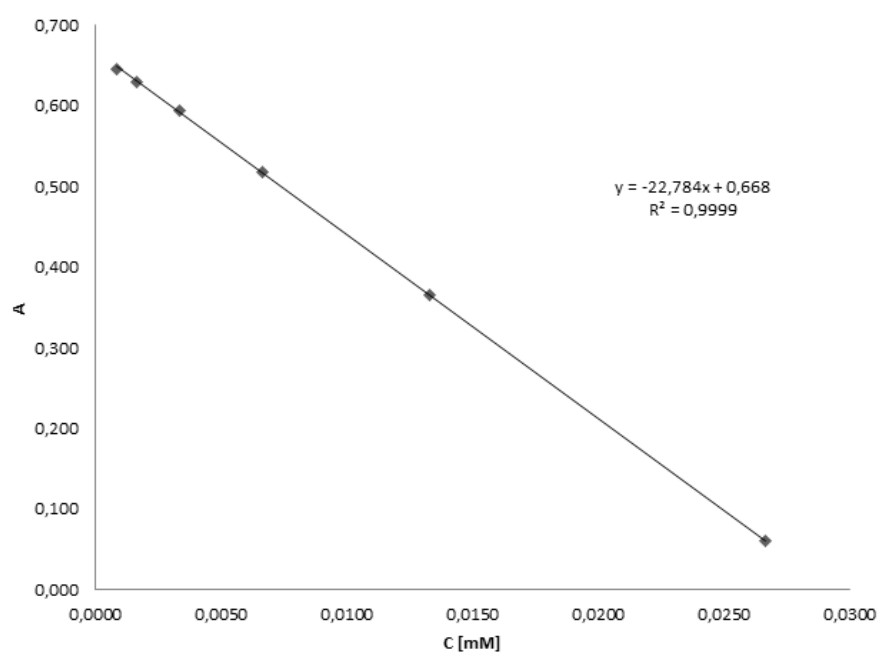

Figure S2. Calibration curve and the equation for DDPH assay

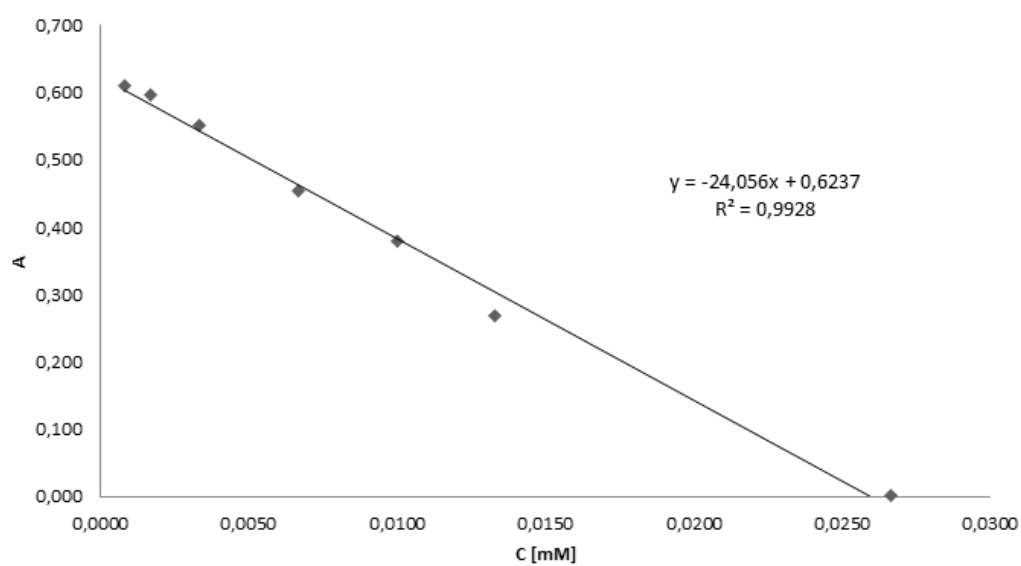

Figure S3. Calibration curve and the equation for ABTS assay

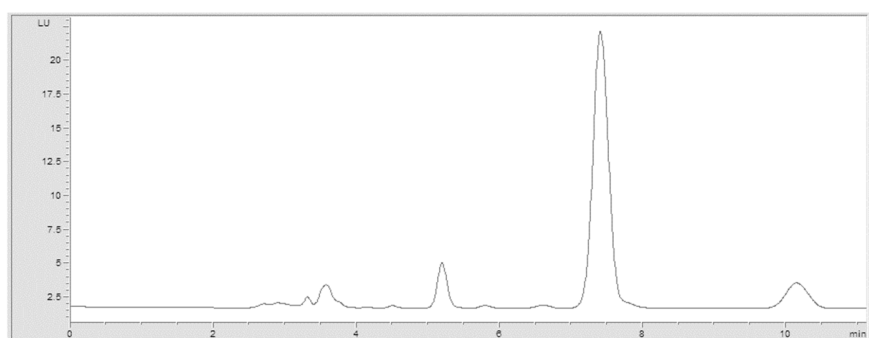

Figure S4. Chromatogram for tocopherol analysis of SFE-1 experiment (350 bar, 70 °C, 0.3 kg CO<sub>2</sub>/h)
